# Supplementary material for: An Overview of the Evolution of Capsule Endoscopy Research—Text-Mining Analysis and Publication Trends
Source: MDPI journal article supplement (doi:10.3390/diagnostics12092238), 2022-09-16

# Title: An Overview of the Evolution of Capsule Endoscopy Research—Text-Mining Analysis and Publication Trends.

## Supplementary Material

**Figure S1.** Capsule endoscopy publications included in the study, according to research areas.

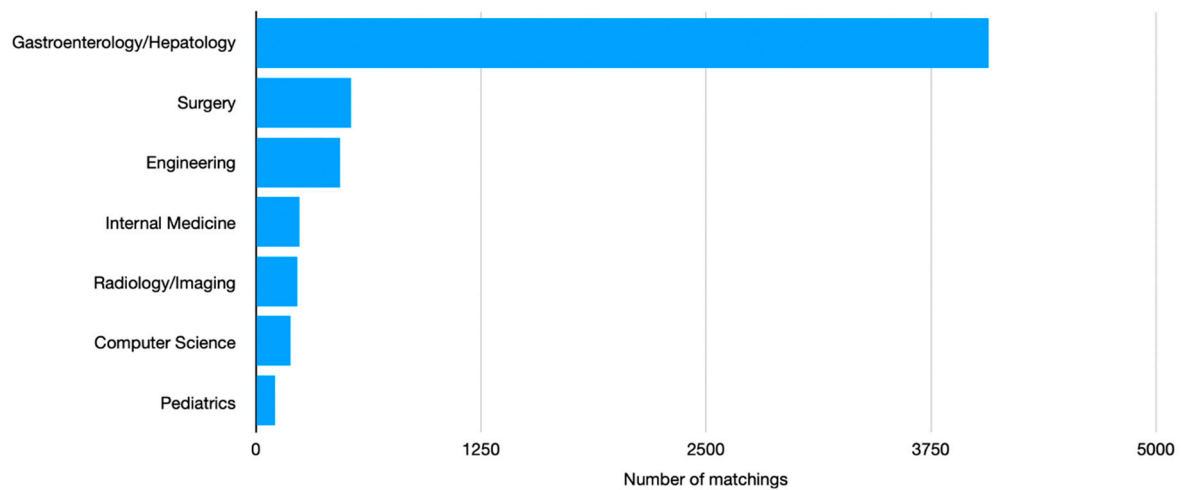

**Table S1:** Top 10 capsule endoscopy publication sources, 2000 to 2021.

| Source                                              | Publications | Impact Factor | % of 5,734 |
|-----------------------------------------------------|--------------|---------------|------------|
| Gastrointestinal Endoscopy                          | 997          | 9.427         | 32.8       |
| American Journal of Gastroenterology                | 469          | 10.864        | 15.4       |
| Gastroenterology                                    | 328          | 22.682        | 10.8       |
| Journal of Gastroenterology and Hepatology          | 247          | 4.029         | 8.1        |
| Endoscopy                                           | 191          | 10.093        | 6.3        |
| Gut                                                 | 190          | 23.059        | 6.3        |
| World Journal of Gastroenterology                   | 170          | 5.742         | 5.6        |
| Digestive and Liver Disease                         | 166          | 4.088         | 5.5        |
| Digestive Diseases and Sciences                     | 127          | 3.199         | 4.2        |
| European Journal of Gastroenterology and Hepatology | 77           | 2.566         | 2.5        |
| Scandinavian Journal of Gastroenterology            | 77           | 2.423         | 2.5        |

**Table S2:** 10 most cited capsule endoscopy articles

| Authors         | Year | Title/DOI                                                                                                            | Source | TC   |
|-----------------|------|----------------------------------------------------------------------------------------------------------------------|--------|------|
| Iddan G. et al. | 2000 | <i>Wireless Capsule Endoscopy</i><br><a href="https://doi.org/10.1038/35013140">https://doi.org/10.1038/35013140</a> | Nature | 1954 |

|                      |      |                                                                                                                                                                                                                                              |                              |     |
|----------------------|------|----------------------------------------------------------------------------------------------------------------------------------------------------------------------------------------------------------------------------------------------|------------------------------|-----|
| Van Assche G. et al. | 2010 | <i>The Second European Evidence-based Consensus on the Diagnosis and Management of Crohn's Disease: Definitions and Diagnosis</i><br><a href="https://doi.org/10.1016/j.crohns.2009.12.003">https://doi.org/10.1016/j.crohns.2009.12.003</a> | J Crohns Colitis             | 796 |
| Pennazio M. et al.   | 2004 | <i>Outcome of Patients With Obscure Gastrointestinal Bleeding After Capsule Endoscopy: Report of 100 Consecutive Cases</i><br><a href="https://doi.org/10.1053/j.gastro.2003.11.057">https://doi.org/10.1053/j.gastro.2003.11.057</a>        | Gastroenterology             | 678 |
| Costamagna G. et al. | 2002 | <i>A Prospective Trial Comparing Small Bowel Radiographs and Video Capsule Endoscopy for Suspected Small Bowel Disease</i><br><a href="https://doi.org/10.1053/gast.2002.35988">https://doi.org/10.1053/gast.2002.35988</a>                  | Gastroenterology             | 625 |
| Levine A. et al.     | 2014 | <i>ESPGHAN Revised Porto Criteria for the Diagnosis of Inflammatory Bowel Disease in Children and Adolescents</i><br>10.1097/MPG.0000000000000239                                                                                            | J Pediatr Gastroenterol Nutr | 621 |
| Van Assche G. et al. | 2010 | <i>The Second European Evidence-based Consensus on the Diagnosis and Management of Crohn's Disease: Special Situations</i><br><a href="https://doi.org/10.1016/j.crohns.2009.09.009">https://doi.org/10.1016/j.crohns.2009.09.009</a>        | J Crohns Colitis             | 540 |
| Ell C. et al.        | 2002 | <i>The First Prospective Controlled Trial Comparing Wireless Capsule Endoscopy with Push Enteroscopy in Chronic Gastrointestinal Bleeding</i><br>DOI: 10.1055/s-2002-33446                                                                   | Endoscopy                    | 515 |
| Annese V. et al.     | 2013 | <i>European Evidence Based Consensus for Endoscopy in Inflammatory Bowel Disease</i><br><a href="https://doi.org/10.1016/j.crohns.2013.09.016">https://doi.org/10.1016/j.crohns.2013.09.016</a>                                              | J Crohns Colitis             | 488 |
| Yamamoto H. et al.   | 2004 | <i>Clinical Outcomes of Double-Balloon Endoscopy for the Diagnosis and Treatment of Small-Intestinal Diseases</i><br><a href="https://doi.org/10.1016/S1542-3565(04)00453-7">https://doi.org/10.1016/S1542-3565(04)00453-7</a>               | Clin Gastroenterol Hepatol   | 484 |
| Goldstein J. et al.  | 2005 | <i>Video Capsule Endoscopy to Prospectively Assess Small Bowel Injury With Celecoxib, Naproxen Plus Omeprazole, and Placebo</i><br><a href="https://doi.org/10.1016/S1542-3565(04)00619-6">https://doi.org/10.1016/S1542-3565(04)00619-6</a> | Clin Gastroenterol Hepatol   | 479 |

**Note:** TC = Total Citations, TCperYear = Total Citations per Year

Figure S2: grouped display of capsule endoscopy publications per keywords, in different timeframes

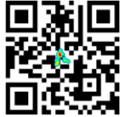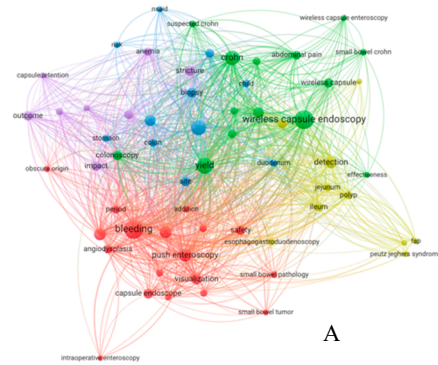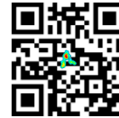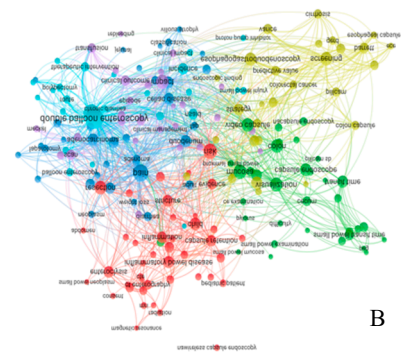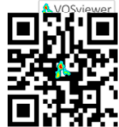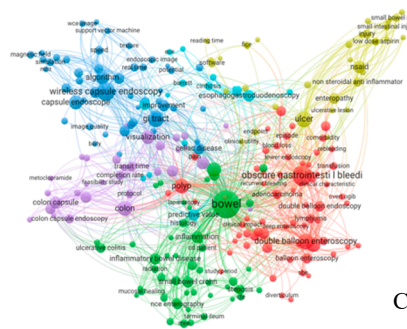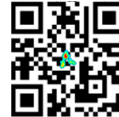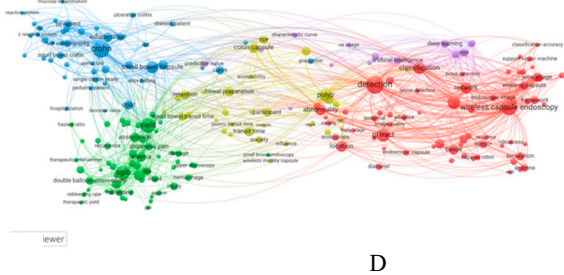

**A: Time segment 1** – 2000-2005; 5,372 terms, min. of 10 occurrences, 60% most relevant terms = 61 terms;  
<https://tinyurl.com/y7wg76oz>

**B: Time segment 2** – 2006-2010; 16,671 terms; min. of 10 occurrences, 60% most relevant terms = 193;  
<https://tinyurl.com/y9hhfw7d>

**C: Time segment 3** – 2011-2016; 23,070 terms; min 10 occurrences, 60% most relevant terms = 250;  
<https://tinyurl.com/y7z3vp4m>

**D: Time segment 4** – 2017-2021; 23,429 terms; min 10 occurrences, 60% most relevant terms = 215;  
<https://tinyurl.com/ybecgs3q>

**Table S3: capsule endoscopy publications per capsule type, 2000 to 2021**

| Type | Documents | Top 3 contributing countries      |          |    |   |        |  |
|------|-----------|-----------------------------------|----------|----|---|--------|--|
| CCE  | n = 349   | Japan                             | (n = 53; | TC | = | 273)   |  |
|      |           | Italy                             | (n = 39; | TC | = | 1283)  |  |
|      |           | USA (n = 19; TC =740)             |          |    |   |        |  |
| ECE  | n = 127   | USA                               | (n = 40; | TC | = | 917)   |  |
|      |           | France                            | (n = 11; | TC | = | 287)   |  |
|      |           | Italy (n = 8; TC = 179)           |          |    |   |        |  |
| MCE  | n = 46    | China                             | (n = 14; | TC | = | 60)    |  |
|      |           | USA                               | (n = 9;  | TC | = | 693)   |  |
|      |           | Italy (n = 5; TC =83)             |          |    |   |        |  |
| NIC  | n = 215   | USA                               | (n = 70; | TC | = | 1,786) |  |
|      |           | Denmark                           | (n = 13; | TC | = | 101)   |  |
|      |           | United Kingdom (n = 12; TC = 264) |          |    |   |        |  |
| RC   | n = 73    | China                             | (n = 43; | TC | = | 397)   |  |
|      |           | USA                               | (n = 31  | TC | = | 698)   |  |
|      |           | Australia (n = 10; TC = 163)      |          |    |   |        |  |

SBCE n = 686      China (n = 96; TC = 1,749 )  
 USA (n = ; TC = 2,008)  
 Japan (n = 54; TC = 444 )

**Note:** Contributing countries by country of origin of corresponding authors;  
 RC, Robotic Capsule; MCE, Magnetic Capsule; CCE, Colon Capsule; ECE, Esophageal Capsule; NIC, Non-imaging Capsule; SBCE, Small-Bowel Capsule.

**Table S4: number of capsule endoscopy publications per year, 2000 to 2021**

| Year | Number of Documents |
|------|---------------------|
| 2000 | 8                   |
| 2001 | 8                   |
| 2002 | 74                  |
| 2003 | 104                 |
| 2004 | 188                 |
| 2005 | 264                 |
| 2006 | 321                 |
| 2007 | 311                 |
| 2008 | 339                 |
| 2009 | 330                 |
| 2010 | 365                 |
| 2011 | 308                 |
| 2012 | 353                 |
| 2013 | 286                 |
| 2014 | 288                 |
| 2015 | 336                 |
| 2016 | 308                 |
| 2017 | 297                 |
| 2018 | 306                 |
| 2019 | 329                 |
| 2020 | 290                 |
| 2021 | 321                 |

**Per country**

| Country of Origin (first author) | Number of Documents |
|----------------------------------|---------------------|
| NA                               | 1385                |
| USA                              | 1048                |
| Japan                            | 592                 |
| China                            | 488                 |
| Italy                            | 309                 |
| United Kingdom                   | 234                 |

|                |     |
|----------------|-----|
| Korea          | 178 |
| Germany        | 176 |
| France         | 151 |
| Spain          | 117 |
| Israel         | 112 |
| Portugal       | 109 |
| Canada         | 89  |
| Australia      | 79  |
| Netherlands    | 74  |
| Greece         | 66  |
| India          | 66  |
| Belgium        | 47  |
| Turkey         | 42  |
| Denmark        | 29  |
| Sweden         | 29  |
| Ireland        | 27  |
| Romania        | 26  |
| Singapore      | 25  |
| Czech Republic | 19  |
| Poland         | 19  |
| Norway         | 16  |
| Iran           | 14  |
| Thailand       | 14  |
| Finland        | 12  |
| Pakistan       | 12  |
| Switzerland    | 12  |
| Brazil         | 11  |
| Malaysia       | 10  |
| Morocco        | 10  |
| Austria        | 9   |
| Bangladesh     | 8   |
| Egypt          | 8   |
| Hungary        | 7   |
| Mexiko         | 7   |
| Saudi Arabia   | 6   |
| New Zealand    | 5   |
| Serbia         | 5   |
| Russia         | 3   |
| South Afrika   | 3   |
| Vietnam        | 3   |
| Algeria        | 2   |
| Colombia       | 2   |
| Philippines    | 2   |

|           |   |
|-----------|---|
| Slovakia  | 2 |
| Slovenia  | 2 |
| Angola    | 1 |
| Argentina | 1 |
| Bahamas   | 1 |
| Bosnia    | 1 |
| Chile     | 1 |
| Cyprus    | 1 |
| Ecuador   | 1 |
| Georgia   | 1 |
| Indonesia | 1 |
| Jordan    | 1 |
| Kuwait    | 1 |
| Lebanon   | 1 |
| Mali      | 1 |

**Table S5:** contribution in capsule endoscopy publications by corresponding authors' countries of origin

| Country           | Docs. | TC    | Norm.C. | Avg.<br>pub.<br>Year | Avg. C. | Avg.<br>norm. C. |
|-------------------|-------|-------|---------|----------------------|---------|------------------|
| Algeria           | 5     | 105   | 18.2    | 2019.2               | 21      | 3.6              |
| Argentina         | 9     | 657   | 48.2    | 2014.3               | 73      | 5.4              |
| Australia         | 147   | 1702  | 94.2    | 2012.4               | 11.6    | 0.6              |
| Austria           | 15    | 1102  | 75.7    | 2013.7               | 73.5    | 5.0              |
| Bangladesh        | 9     | 198   | 19.2    | 2017                 | 22      | 2.1              |
| Belgium           | 71    | 4836  | 314.6   | 2013.1               | 68.1    | 4.4              |
| Brazil            | 18    | 509   | 62.2    | 2013.9               | 28.3    | 3.5              |
| Canada            | 138   | 4194  | 340.6   | 2014.3               | 30.4    | 2.5              |
| Cyprus            | 6     | 78    | 13.2    | 2017.7               | 13      | 2.2              |
| Czech<br>Republic | 27    | 1129  | 65.8    | 2013.6               | 41.8    | 2.4              |
| Denmark           | 38    | 1858  | 156.8   | 2016.1               | 48.9    | 4.1              |
| Egypt             | 15    | 218   | 22.1    | 2015.3               | 14.5    | 1.5              |
| Finland           | 21    | 1473  | 86.1    | 2013.1               | 70.1    | 4.1              |
| France            | 177   | 8490  | 501.3   | 2013.1               | 47.9    | 2.8              |
| Germany           | 229   | 11427 | 640.0   | 2011.3               | 49.9    | 2.8              |
| Greece            | 81    | 4976  | 294.6   | 2012.5               | 61.4    | 3.6              |
| Hungary           | 11    | 725   | 39.3    | 2011.8               | 65.9    | 3.6              |
| India             | 79    | 941   | 97.8    | 2015.5               | 11.9    | 1.2              |
| Iran              | 20    | 103   | 14.9    | 2017.9               | 5.2     | 0.7              |
| Ireland           | 43    | 751   | 70.3    | 2015.9               | 17.5    | 1.6              |
| Israel            | 173   | 9920  | 492.7   | 2011.9               | 57.3    | 2.8              |
| Italy             | 437   | 14698 | 827.4   | 2012.7               | 33.6    | 1.9              |

|                          |      |       |        |         |       |      |
|--------------------------|------|-------|--------|---------|-------|------|
| Japan                    | 585  | 8591  | 555.1  | 2014.4  | 14.7  | 0.9  |
| Lebanon                  | 6    | 60    | 13.9   | 2020    | 10    | 2.3  |
| Malaysia                 | 16   | 364   | 35.8   | 2017.1  | 22.8  | 2.2  |
| Malta                    | 8    | 462   | 68.5   | 2019.6  | 57.8  | 8.6  |
| Mexico                   | 16   | 252   | 21.2   | 2015.7  | 15.8  | 1.3  |
| Morocco                  | 13   | 109   | 14.7   | 2017.5  | 8.4   | 1.1  |
| Netherlands              | 98   | 5467  | 351.1  | 2012    | 55.8  | 3.6  |
| New Zealand              | 15   | 355   | 20.8   | 2015    | 23.7  | 1.4  |
| Norway                   | 32   | 670   | 55.1   | 2015.1  | 20.9  | 1.7  |
| Pakistan                 | 24   | 495   | 80.9   | 2018.64 | 20.6  | 3.4  |
| China                    | 436  | 6519  | 512.2  | 2015.8  | 14.9  | 1.2  |
| Poland                   | 31   | 1107  | 90.3   | 2016.8  | 35.7  | 2.9  |
| Portugal                 | 137  | 4454  | 316.6  | 2016.4  | 32.5  | 2.3  |
| Romania                  | 31   | 353   | 22.6   | 2013.6  | 11.4  | 0.7  |
| Saudi Arabia             | 15   | 257   | 45.7   | 2017.6  | 17.1  | 3.0  |
| Serbia                   | 8    | 66    | 4.6    | 2013.5  | 8.3   | 0.6  |
| Singapore                | 32   | 562   | 42.9   | 2013.5  | 17.6  | 1.3  |
| South Africa             | 5    | 42    | 6.4    | 2014.8  | 8.4   | 1.3  |
| South Korea              | 186  | 3428  | 268.4  | 2014.4  | 18.4  | 1.4  |
| Spain                    | 171  | 6477  | 425.9  | 2013.3  | 37.9  | 2.5  |
| Sweden                   | 57   | 1918  | 122.1  | 2012.9  | 33.7  | 2.1  |
| Switzerland              | 33   | 2672  | 173.4  | 2012.3  | 80.9  | 5.3  |
| Taiwan                   | 45   | 661   | 45.3   | 2012.2  | 14.7  | 1.0  |
| Thailand                 | 16   | 76    | 6.7    | 2015.6  | 4.8   | 0.4  |
| Turkey                   | 41   | 358   | 24.7   | 2012.5  | 8.7   | 0.6  |
| United Arab.<br>Emirates | 5    | 503   | 67.8   | 2018.8  | 100.6 | 13.6 |
| United<br>Kingdom        | 461  | 12941 | 783.8  | 2013.8  | 28.1  | 1.7  |
| USA                      | 1229 | 26622 | 1534.0 | 2011.9  | 21.7  | 1.2  |

**Note:** Docs = Documents, TC = Total Citations, Norm.C. = Normalized Citations, Avg. pub. Year = Average publication year, Avg. C. = Average Citations, Avg. norm. C. = Average normalized Citations

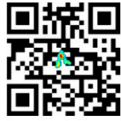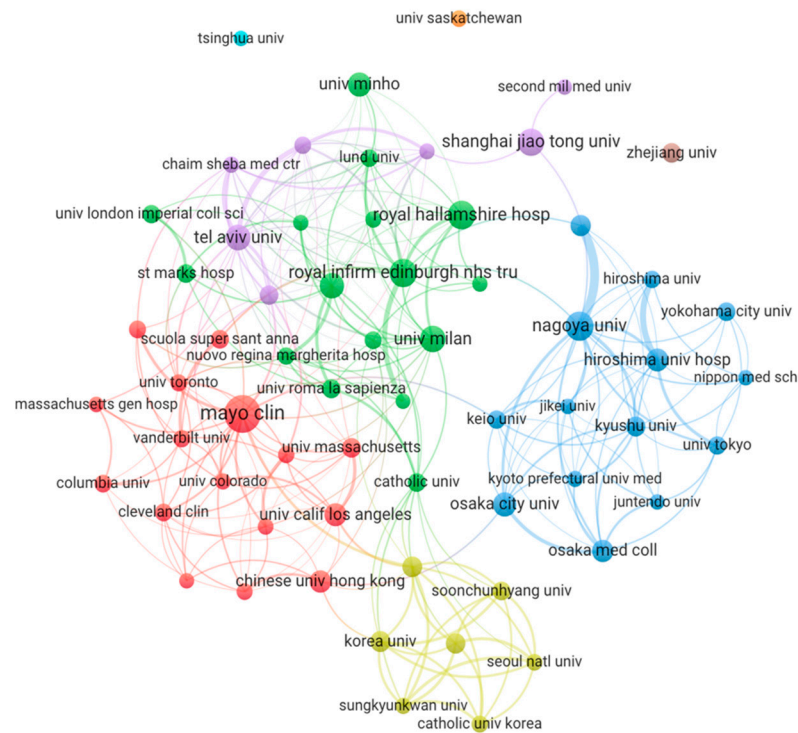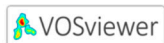

**Figure S3:** authorship collaboration co-occurrence network

An interactive visualization is available at <https://tinyurl.com/yc6vtgvh> or via the QR-code above.

Layout settings in VOSviewer: attraction = 2, repulsion = -2 , resolution = 1, min. cluster size = 1

| Organization                                | Cluster | Docs | TC   | Norm. C | Avg. pub. Year | Avg.C | Avg. norm.C |
|---------------------------------------------|---------|------|------|---------|----------------|-------|-------------|
| Mayo Clinic, USA                            | 1       | 117  | 4920 | 243.3   | 2012.1         | 42.1  | 2.1         |
| Nagoya University, Japan                    | 3       | 70   | 1235 | 105.3   | 2015.4         | 17.6  | 1.5         |
| Royal Hallamshire Hospital, UK              | 2       | 67   | 741  | 45.6    | 2012.8         | 11.1  | 0.7         |
| Royal Infirmary of Edinburgh, UK            | 2       | 66   | 797  | 78.1    | 2015.3         | 12.1  | 1.2         |
| Shanghai Jiao Tong University, China        | 5       | 62   | 1170 | 71.4    | 2014.4         | 18.9  | 1.2         |
| University Milan, Italy                     | 2       | 58   | 2745 | 128.3   | 2012.3         | 47.3  | 2.2         |
| Tel Aviv University, Israel                 | 5       | 55   | 1775 | 133.7   | 2014.2         | 32.3  | 2.4         |
| Università Cattolica del Sacro Cuore, Italy | 2       | 53   | 2171 | 142.0   | 2013.4         | 41.0  | 2.7         |
| Osaka City University, Japan                | 3       | 48   | 905  | 57.7    | 2014.2         | 18.9  | 1.2         |
| University of Minho, Portugal               | 2       | 48   | 354  | 38.7    | 2018           | 7.4   | 0.8         |
| Hiroshima University Hospital, Japan        | 3       | 44   | 792  | 73.7    | 2015.6         | 18.0  | 1.7         |
| University of California, USA               | 1       | 44   | 440  | 31.9    | 2012.9         | 10.0  | 0.7         |
| The Chinese University of Hong Kong, China  | 1       | 41   | 1518 | 110.6   | 2013.1         | 37.0  | 2.7         |
| Osaka Medical College, Japan                | 3       | 41   | 665  | 41.2    | 2015.4         | 16.2  | 1.0         |
| Nagoya University Hospital, Japan           | 3       | 37   | 603  | 39.5    | 2015.3         | 16.3  | 1.1         |



|                                                              |   |    |      |       |        |      |     |
|--------------------------------------------------------------|---|----|------|-------|--------|------|-----|
| Korea University, Korea                                      | 4 | 36 | 608  | 43.5  | 2013.4 | 16.9 | 1.2 |
| University of Ulsan, Korea                                   | 4 | 35 | 968  | 59.2  | 2013.7 | 27.7 | 1.7 |
| Yonsei University, Korea                                     | 4 | 34 | 791  | 47.3  | 2012.6 | 23.3 | 1.4 |
| Kyushu University, Japan                                     | 3 | 33 | 899  | 50.8  | 2013.3 | 27.2 | 1.5 |
| University of Massachusetts, USA                             | 1 | 32 | 347  | 26.0  | 2014.5 | 10.8 | 0.8 |
| Zhejiang University of Science, China                        | 8 | 32 | 504  | 34.4  | 2014.9 | 15.8 | 1.1 |
| Technion - Israel Institute of Technology                    | 5 | 31 | 1609 | 62.6  | 2010.3 | 51.9 | 2.0 |
| University Roma la Sapienza, Italy                           | 2 | 30 | 1760 | 104.3 | 2012.6 | 58.7 | 3.5 |
| Catholic University, Rome, Italy                             | 2 | 29 | 1393 | 71.2  | 2011.8 | 48.0 | 2.5 |
| Scuola Superiore Sant'Anna di Pisa, Italy                    | 1 | 29 | 1385 | 71.8  | 2012.6 | 47.8 | 2.5 |
| Soonchunhyang University, Korea                              | 4 | 29 | 274  | 34.4  | 2017.4 | 9.4  | 1.2 |
| St Mark's Hospital, London/UK                                | 2 | 29 | 623  | 54.3  | 2011.2 | 21.5 | 1.9 |
| Yokohama City University, Japan                              | 3 | 29 | 505  | 29.9  | 2013.1 | 17.4 | 1.0 |
| Keio University, Korea                                       | 3 | 28 | 439  | 41.2  | 2014.1 | 15.7 | 1.5 |
| Imperial College of Science, Technology and Medicine, London | 2 | 28 | 1053 | 58.9  | 2010.9 | 37.6 | 2.1 |
| University of Tokyo, Japan                                   | 3 | 28 | 474  | 55.7  | 2015.3 | 16.9 | 2.0 |
| Cleveland Clinic, USA                                        | 1 | 26 | 484  | 53.8  | 2011.8 | 18.6 | 2.1 |
| Columbia University, USA                                     | 1 | 26 | 712  | 59.7  | 2013.8 | 27.4 | 2.3 |
| Indiana University Bloomington, USA                          | 1 | 26 | 782  | 50.6  | 2010.6 | 30.1 | 1.9 |
| Lund University, Sweden                                      | 2 | 26 | 259  | 32.4  | 2014.3 | 10.0 | 1.2 |
| Hiroshima University, Japan                                  | 3 | 25 | 711  | 39.9  | 2013.7 | 28.4 | 1.6 |
| Ospedale Nuovo Regina Margherita, Italy                      | 2 | 25 | 673  | 69.2  | 2016.6 | 26.9 | 2.8 |
| Sheba Medical Center, Israel                                 | 5 | 25 | 739  | 69.7  | 2017.7 | 29.6 | 2.8 |
| Vanderbilt University, USA                                   | 1 | 25 | 1016 | 77.2  | 2014.1 | 40.6 | 3.1 |
| Catholic University of Korea, Korea                          | 4 | 24 | 432  | 32.5  | 2013.6 | 18.0 | 1.4 |
| Oregon Health & Science University, USA                      | 1 | 24 | 1017 | 55.7  | 2011.2 | 42.4 | 2.3 |
| University of Toronto, Canada                                | 1 | 24 | 1670 | 146.4 | 2013   | 69.6 | 6.1 |
| Seoul National University, Korea                             | 4 | 23 | 588  | 39.0  | 2013.1 | 25.6 | 1.7 |
| Stanford University, USA                                     | 1 | 23 | 1114 | 50.7  | 2010.9 | 48.4 | 2.2 |
| University of Athens, Greece                                 | 2 | 23 | 686  | 33.3  | 2010.1 | 29.8 | 1.4 |
| University of Saskatchewan, Canada                           | 7 | 23 | 328  | 26.1  | 2016.4 | 14.3 | 1.1 |
| Sheba Medical Center, Israel                                 | 5 | 22 | 484  | 31.0  | 2012.8 | 22.0 | 1.4 |
| Kyoto Prefectural University of Medicine, Japan              | 3 | 22 | 327  | 21.3  | 2013.5 | 14.9 | 1.0 |
| Sungkyunkwan University, Korea                               | 4 | 22 | 487  | 32.1  | 2013   | 22.1 | 1.5 |
| University of Colorado Boulder, USA                          | 1 | 22 | 404  | 49.6  | 2016.4 | 18.4 | 2.3 |
| University of Michigan, USA                                  | 1 | 22 | 442  | 25.4  | 2012.6 | 20.1 | 1.2 |
| Hôpital Edouard Herriot, France                              | 2 | 21 | 1236 | 71.6  | 2013   | 58.9 | 3.4 |
| McGill University, Japan                                     | 5 | 21 | 275  | 21.5  | 2014.6 | 13.1 | 1.0 |
| Sheffield Teaching Hospital, UK                              | 2 | 21 | 39   | 5.6   | 2017.5 | 1.9  | 0.3 |
| Jikei University School of Medicine, Japan                   | 3 | 20 | 226  | 27.3  | 2015.7 | 11.3 | 1.4 |

|                                            |   |    |     |      |        |      |     |
|--------------------------------------------|---|----|-----|------|--------|------|-----|
| Juntendo University, Japan                 | 3 | 20 | 130 | 19.4 | 2015.9 | 6.5  | 1.0 |
| Massachusetts General Hospital, USA        | 1 | 20 | 705 | 61.8 | 2015.9 | 35.3 | 3.1 |
| Nippon Medical School, Japan               | 3 | 20 | 440 | 23.3 | 2013.9 | 22.0 | 1.2 |
| Second Military Medical University, Chihna | 5 | 20 | 787 | 51.4 | 2015.2 | 39.4 | 2.6 |
| Tsinghua University, China                 | 6 | 20 | 214 | 19.2 | 2014.6 | 10.7 | 1.0 |
| University of Edinburgh, UK                | 2 | 20 | 876 | 54.5 | 2015.5 | 43.8 | 2.7 |
| Washington University, USA                 | 1 | 20 | 434 | 28.2 | 2012.7 | 21.7 | 1.4 |

**Note:** Docs = Documents, TC = Total Citations, Norm.C. = Normalized Citations, Avg.pub.Year = Average publication year, Avg.C.= Average Citations, Avg.norm.C. = Average normalized Citations

## Key terms

| Keyword                 | Occurrences | Avg.pub.Year | Avg.Citations | Avg.norm. Citations |
|-------------------------|-------------|--------------|---------------|---------------------|
| Diagnostic Yield        | 1126        | 2012.8       | 26.9          | 1.5                 |
| IBD                     | 629         | 2012.3       | 34.0          | 1.9                 |
| OGIB                    | 580         | 2012.7       | 23.0          | 1.2                 |
| Cancer                  | 484         | 2012.9       | 25.9          | 1.5                 |
| Disease                 | 335         | 2011.6       | 28.3          | 1.5                 |
| Lesions                 | 242         | 2013.2       | 22.7          | 1.3                 |
| Clinical Impact         | 235         | 2012.7       | 31.2          | 1.7                 |
| Experience              | 203         | 2010.9       | 34.0          | 1.5                 |
| Imaging                 | 202         | 2014.0       | 20.5          | 1.6                 |
| Risk Factors            | 200         | 2014.1       | 22.6          | 1.4                 |
| Polyposis               | 160         | 2012.5       | 29.7          | 1.8                 |
| NSAID                   | 157         | 2013.3       | 29.9          | 1.7                 |
| Injury                  | 156         | 2013.6       | 26.1          | 1.5                 |
| ICT                     | 142         | 2012.9       | 29.5          | 1.6                 |
| Celiac Disease          | 139         | 2012.7       | 27.1          | 1.7                 |
| Complications           | 139         | 2012.6       | 24.4          | 1.3                 |
| Transit time            | 134         | 2012.8       | 21.9          | 1.3                 |
| Artificial Intelligence | 130         | 2017.9       | 19.9          | 2.6                 |
| Pediatric patients      | 126         | 2013.0       | 19.1          | 1.1                 |
| Retention               | 122         | 2013.8       | 20.1          | 1.3                 |
| IDA                     | 105         | 2013.9       | 19.3          | 1.3                 |

|                       |     |        |      |     |
|-----------------------|-----|--------|------|-----|
| Polyps                | 100 | 2013.5 | 20.3 | 1.4 |
| Classification        | 95  | 2016.0 | 33.8 | 2.7 |
| Bowel preparation     | 84  | 2013.2 | 25.9 | 1.6 |
| Angiodysplasia        | 83  | 2013.4 | 21.8 | 1.2 |
| Biomarker             | 80  | 2016.3 | 43.2 | 3.3 |
| Surveillance          | 80  | 2012.6 | 29.5 | 1.7 |
| Portal hypertension   | 79  | 2012.6 | 16.2 | 0.9 |
| Outcome               | 73  | 2015.0 | 23.7 | 1.7 |
| PPI                   | 67  | 2012.9 | 23.4 | 1.3 |
| Barrett's esophagus   | 63  | 2013.5 | 21.4 | 1.5 |
| Patency               | 62  | 2012.9 | 38.8 | 2.2 |
| GERD                  | 60  | 2010.7 | 22.2 | 1.1 |
| Pathology             | 58  | 2012.1 | 35.8 | 2.1 |
| Validation            | 58  | 2016.0 | 23.5 | 2.0 |
| Activity index        | 54  | 2015.6 | 20.6 | 1.6 |
| Cirrhosis             | 53  | 2012.8 | 15.9 | 0.9 |
| Safety                | 50  | 2013.3 | 23.8 | 1.4 |
| Motility              | 49  | 2013.9 | 17.1 | 1.1 |
| Ulcer                 | 47  | 2011.0 | 26.8 | 1.5 |
| Recurrence            | 46  | 2013.5 | 31.7 | 1.7 |
| Prevention            | 45  | 2013.0 | 25.6 | 1.7 |
| Helicobacter pylori   | 43  | 2012.2 | 19.8 | 1.2 |
| Prokinetics           | 41  | 2012.6 | 20.4 | 1.0 |
| Obstruction           | 40  | 2011.6 | 22.2 | 1.2 |
| Stenosis              | 40  | 2013.0 | 19.5 | 1.1 |
| Resection             | 39  | 2013.2 | 52.2 | 4.0 |
| Screening             | 38  | 2013.3 | 19.7 | 1.4 |
| Abdominal pain        | 36  | 2011.8 | 26.5 | 1.6 |
| Biopsy                | 36  | 2013.5 | 25.1 | 1.6 |
| Atrophy               | 35  | 2013.3 | 26.5 | 1.9 |
| Localization          | 35  | 2015.2 | 14.6 | 1.3 |
| Completion rate       | 34  | 2015.7 | 13.1 | 1.0 |
| Simethicone           | 34  | 2015.2 | 17.5 | 1.4 |
| Mortality             | 31  | 2014.0 | 24.0 | 1.6 |
| Cost effectiveness    | 30  | 2013.3 | 18.7 | 1.4 |
| Enteritis             | 30  | 2011.3 | 39.4 | 1.6 |
| Prognosis             | 30  | 2012.5 | 23.0 | 1.3 |
| Rheumatoid arthritis  | 28  | 2012.3 | 38.2 | 2.0 |
| Gluten free diet      | 27  | 2013.6 | 31.6 | 1.7 |
| Adult patients        | 26  | 2013.8 | 17.8 | 1.1 |
| Infliximab            | 25  | 2014.0 | 39.9 | 2.3 |
| Robotics              | 25  | 2016.4 | 40.0 | 3.0 |
| Antennas              | 24  | 2018.5 | 12.9 | 1.4 |
| Locomotion            | 21  | 2016.8 | 26.0 | 2.1 |
| Intussusception       | 20  | 2012.4 | 19.2 | 1.0 |
| Transmission          | 20  | 2014.6 | 24.5 | 1.7 |
| Meckel's diverticulum | 19  | 2011.4 | 14.1 | 0.6 |

|                        |    |        |      |     |
|------------------------|----|--------|------|-----|
| Prediction             | 19 | 2015.1 | 18.9 | 1.4 |
| Insertion              | 18 | 2009.8 | 76.8 | 2.9 |
| Permeability           | 18 | 2011.7 | 58.4 | 2.5 |
| Vascular malformations | 18 | 2012.4 | 32.1 | 1.8 |
| Diarrhea               | 17 | 2013.6 | 13.7 | 0.8 |
| Expression             | 16 | 2010.9 | 16.2 | 0.8 |
| Infection              | 16 | 2012.2 | 14.1 | 0.6 |
| Score                  | 16 | 2017.5 | 15.1 | 1.6 |
| Survival               | 16 | 2012.4 | 25.4 | 1.5 |
| Angiodysplasia         | 15 | 2010.9 | 16.5 | 0.8 |
| Colitis                | 15 | 2012.4 | 47.2 | 2.3 |
| Esophageal             | 15 | 2012.1 | 21.5 | 1.6 |
| Jejunum                | 15 | 2013.0 | 11.1 | 0.6 |
| Recognition            | 15 | 2018.7 | 27.5 | 4.3 |
| Reconstruction         | 15 | 2014.9 | 36.5 | 2.7 |
| Small-bowel diseases   | 15 | 2010.4 | 31.5 | 1.7 |

**Note:** Docs = Documents, TC = Total Citations, Norm.C. = Normalized Citations, Avg. pub. Year = Average publication year, Avg. C. = Average Citations, Avg. norm. C. = Average normalized Citations

## Most cited publications per capsule type

### 1. CCE

| Author(s)                                                | Year | Source                  | Title                                                                                                                                                                                | TC  | TCper<br>Year | NTC   |
|----------------------------------------------------------|------|-------------------------|--------------------------------------------------------------------------------------------------------------------------------------------------------------------------------------|-----|---------------|-------|
| VAN<br>GOSSUM,<br>A. et al.                              | 2009 | N ENGL J MED            | <i>Capsule Endoscopy versus Colonoscopy for the Detection of Polyps and Cancer</i><br>DOI: 10.1056/NEJMoa0806347                                                                     | 252 | 18            | 4.5   |
| ELIAKIM,<br>R. et al.                                    | 2006 | ENDOSCOPY               | <i>Evaluation of the PillCam Colon capsule in the detection of colonic pathology: results of the first multicenter, prospective, comparative study</i><br>DOI: 10.1055/s-2006-944832 | 251 | 14.76         | 1.138 |
| ELIAKIM,R<br>. et al.                                    | 2009 | ENDOSCOPY               | <i>Prospective multicenter performance evaluation of the second-generation colon capsule compared with colonoscopy</i><br>DOI: 10.1055/s-0029-1215360                                | 208 | 14.86         | 3.714 |
| SCHOOFS,<br>N.,<br>DEVIERE,<br>J. & VAN<br>GOSSUM,<br>A. | 2006 | ENDOSCOPY               | <i>PillCam colon capsule endoscopy compared with colonoscopy for colorectal tumor diagnosis: a prospective pilot study</i><br>DOI: 10.1055/s-2006-944835                             | 190 | 11.18         | 0.862 |
| SPADA, C.<br>et al.                                      | 2011 | GASTROINTES<br>T ENDOSC | <i>Second-generation colon capsule endoscopy compared with colonoscopy</i><br>DOI: 10.1016/j.gie.2011.03.1125                                                                        | 186 | 15.5          | 7.417 |

### 2. SBCE

| Author(s) | Year | Source | Title | TC | TCpe<br>r | NTC |
|-----------|------|--------|-------|----|-----------|-----|
|-----------|------|--------|-------|----|-----------|-----|

|                                              |      |                     |                                                                                                                                                                                                                                                                | Year |       |        |
|----------------------------------------------|------|---------------------|----------------------------------------------------------------------------------------------------------------------------------------------------------------------------------------------------------------------------------------------------------------|------|-------|--------|
| PENNAZIO, M. et al.                          | 2015 | ENDOSCOPY           | <i>Small-bowel capsule endoscopy and device-assisted enteroscopy for diagnosis and treatment of small-bowel disorders: European Society of Gastrointestinal Endoscopy (ESGE) Clinical Guideline</i><br>DOI: 10.1055/s-0034-1391855                             | 412  | 51.5  | 14.91  |
| LIAO, Z. et al.                              | 2010 | GASTROINTEST ENDOSC | <i>Indications and detection, completion, and retention rates of small-bowel capsule endoscopy: a systematic review</i><br>DOI: 10.1016/j.gie.2009.09.031                                                                                                      | 407  | 31.31 | 13.451 |
| ENNS, R.A. et al.                            | 2017 | GASTROENTEROL-OGY   | <i>Clinical Practice Guidelines for the Use of Video Capsule Endoscopy</i><br>DOI: 10.1053/j.gastro.2016.12.032                                                                                                                                                | 170  | 28.33 | 12.897 |
| DELVAUX, M., FASSLER, I. & GAY, G.           | 2004 | ENDOSCOPY           | <i>Clinical Usefulness of the Endoscopic Video Capsule as the Initial Intestinal Investigation in Patients with Obscure Digestive Bleeding: Validation of a Diagnostic Strategy Based on the Patient Outcome after 12 Months</i><br>DOI: 10.1055/s-2004-826034 | 157  | 8.26  | 1.019  |
| ADLER, D.G., KNIPSCHIEL D, M. & GOSTOUT, Ch. | 2004 | GASTROINTEST ENDOSC | <i>A prospective comparison of capsule endoscopy and push enteroscopy in patients with GI bleeding of obscure origin</i><br>DOI: 10.1016/S0016-5107(03)02862-1                                                                                                 | 151  | 7.95  | 0.981  |

### 3. RC

| Author(s)                         | Year | Source                | Title                                                                                                                                                                                           | TC  | TCper Year | NTC   |
|-----------------------------------|------|-----------------------|-------------------------------------------------------------------------------------------------------------------------------------------------------------------------------------------------|-----|------------|-------|
| MOGLIA, A. et al.                 | 2007 | BIOMED MICRODEVICES   | <i>Wireless capsule endoscopy: from diagnostic devices to multipurpose robotic systems</i><br><a href="https://doi.org/10.1007/s10544-006-9025-3">https://doi.org/10.1007/s10544-006-9025-3</a> | 159 | 9.94       | 1     |
| VALDASTR I, P. et al.             | 2009 | IEEE TRANS ROBOT      | <i>A New Mechanism for Mesoscale Legged Locomotion in Compliant Tubular Environments</i><br>DOI:10.1109/TRO.2009.2014127                                                                        | 158 | 11.29      | 1     |
| GLASS, P., CHEUNG; E. & SITTI; M. | 2008 | IEEE TRANS BIOMED ENG | <i>A Legged Anchoring Mechanism for Capsule Endoscopes Using Micropatterned Adhesives</i><br>DOI:10.1109/TBME.2008.2002111                                                                      | 118 | 7.87       | 1     |
| YIM, S. & SITTI, M.               | 2012 | IEEE TRANS ROBOT      | <i>Shape-Programmable Soft Capsule Robots for Semi-Implantable Drug Delivery</i><br>DOI: 10.1109/TRO.2012.2197309                                                                               | 77  | 7          | 1.593 |

|                          |      |             |                                                                                                                                                     |    |      |       |
|--------------------------|------|-------------|-----------------------------------------------------------------------------------------------------------------------------------------------------|----|------|-------|
| VALDASTR<br>I, P. et al. | 2012 | SURG ENDOSC | <i>Magnetic air capsule robotic system:<br/>proof of concept of a novel approach<br/>for painless colonoscopy</i><br>DOI: 10.1007/s00464-011-2054-x | 56 | 5.09 | 1.159 |
|--------------------------|------|-------------|-----------------------------------------------------------------------------------------------------------------------------------------------------|----|------|-------|

#### 4. ECE

| Author(s)                                          | Year | Source                       | Title                                                                                                                                                                                                                                                             | TC  | TCper<br>Year | NTC  |
|----------------------------------------------------|------|------------------------------|-------------------------------------------------------------------------------------------------------------------------------------------------------------------------------------------------------------------------------------------------------------------|-----|---------------|------|
| EISEN,<br>G.M. et al.                              | 2006 | BIOMED<br>MICRODEVICE<br>S   | <i>The Accuracy of PillCam ESO Capsule<br/>Endoscopy Versus Conventional Upper<br/>Endoscopy for the Diagnosis of<br/>Esophageal Varices: A Prospective<br/>Three-Center Pilot Study</i><br>DOI: 10.1055/s-2005-921189                                            | 120 | 7.06          | 2.94 |
| DE<br>FRANCHIS,<br>R. et al.                       | 2008 | HEPATOLOGY                   | <i>Esophageal capsule endoscopy for<br/>screening and surveillance of<br/>esophageal varices in patients with<br/>portal hypertension</i><br><a href="https://doi.org/10.1002/hep.22227">https://doi.org/10.1002/hep.22227</a>                                    | 110 | 7.33          | 4.76 |
| ELIAKIM,<br>R. et al.                              | 2005 | J CLIN<br>GASTROENTE<br>ROL  | <i>A Prospective Study of the Diagnostic<br/>Accuracy of PillCam ESO Esophageal<br/>Capsule Endoscopy Versus<br/>Conventional Upper Endoscopy in<br/>Patients With Chronic<br/>Gastroesophageal Reflux Diseases</i><br>DOI:<br>10.1097/01.mcg.0000170764.29202.24 | 104 | 5.78          | 3.8  |
| ELIAKIM,<br>R.,<br>SHLOMI, I.<br>& EISEN, G.<br>M. | 2004 | ALIMENT<br>PHARMACOL<br>THER | <i>A novel diagnostic tool for detecting<br/>oesophageal pathology: the PillCam<br/>oesophageal video capsule</i><br><a href="https://doi.org/10.1111/j.1365-2036.2004.02206.x">https://doi.org/10.1111/j.1365-2036.2004.02206.x</a>                              | 100 | 5.26          | 2.91 |
| REY, J.F. et<br>al.                                | 2006 | ENDOSCOPY                    | <i>European Society of Gastrointestinal<br/>Endoscopy (ESGE)<br/>Video capsule endoscopy: Update to<br/>guidelines (May 2006)</i><br>DOI: 10.1055/s-2006-944874                                                                                                   | 98  | 5.76          | 2.4  |

#### 5. MCE

| Author(s)                             | Year | Source                            | Title                                                                                                                                                                                                                                                                             | TC  | TCper<br>Year | NTC   |
|---------------------------------------|------|-----------------------------------|-----------------------------------------------------------------------------------------------------------------------------------------------------------------------------------------------------------------------------------------------------------------------------------|-----|---------------|-------|
| YIM, S. &<br>SITTI, M.                | 2012 | IEEE TRANS<br>ROBOT               | <i>Design and Rolling Locomotion of a<br/>Magnetically Actuated Soft Capsule<br/>Endoscope</i><br>DOI: 10.1109/TRO.2011.2163861                                                                                                                                                   | 200 | 18.18         | 1.444 |
| YIM, S. et<br>al.                     | 2014 | IEEE TRANS<br>BIOMED ENG          | <i>Biopsy using a Magnetic Capsule Endoscope<br/>Carrying, Releasing, and Retrieving<br/>Untethered Microgrippers</i><br>DOI: 10.1109/TBME.2013.2283369                                                                                                                           | 134 | 14.89         | 1     |
| MAHONEY,<br>A.W. &<br>ABBOT, J.<br>J. | 2016 | INT J ROBOT<br>RES                | <i>Five-degree-of-freedom manipulation of an<br/>untethered magnetic device in fluid using a<br/>single permanent magnet with application in<br/>stomach capsule endoscopy</i><br><a href="https://doi.org/10.1177/0278364914558006">https://doi.org/10.1177/0278364914558006</a> | 97  | 13.86         | 1.805 |
| LIAO, Z.<br>et al.                    | 2016 | CLIN<br>GASTROENTE<br>ROL HEPATOL | <i>Accuracy of Magnetically Controlled Capsule<br/>Endoscopy, Compared With Conventional<br/>Gastroscopy, in Detection of Gastric<br/>Diseases</i>                                                                                                                                | 92  | 13.14         | 1.712 |

<https://doi.org/10.1016/j.cgh.2016.05.013>

YIM, S. & SITTI, M. 2012 IEEE TRANS ROBOT-a *Shape-Programmable Soft Capsule Robots for Semi-Implantable Drug Delivery* 77 7 0.556  
DOI: 10.1109/TRO.2012.2197309

## 6. NIC

| Author(s)                                                                       | Year | Source                           | Title                                                                                                                                                                                                                                                                           | TC  | TCper<br>Year | NTC    |
|---------------------------------------------------------------------------------|------|----------------------------------|---------------------------------------------------------------------------------------------------------------------------------------------------------------------------------------------------------------------------------------------------------------------------------|-----|---------------|--------|
| RAO,S.S.C<br>. et al.                                                           | 2011 | NEUROGASTRO-<br>ENTEROL MOTIL    | <i>Evaluation of gastrointestinal transit in clinical practice: position paper of the American and European Neurogastroenterology and Motility Societies</i><br><a href="https://doi.org/10.1111/j.1365-2982.2010.01612.x">https://doi.org/10.1111/j.1365-2982.2010.01612.x</a> | 216 | 18            | 8.16   |
| RAO,<br>S.S.C. et al.                                                           | 2009 | CLIN<br>GASTROENTEROL<br>HEPATOL | <i>Investigation of Colonic and Whole-Gut Transit With Wireless Motility Capsule and Radiopaque Markers in Constipation</i><br><a href="https://doi.org/10.1016/j.cgh.2009.01.017">https://doi.org/10.1016/j.cgh.2009.01.017</a>                                                | 205 | 14.64         | 2.253  |
| SAAD, R.J.<br>et al.                                                            | 2010 | AM<br>GASTROENTEROL              | <i>Do Stool Form and Frequency Correlate With Whole-Gut and Colonic Transit? Results From a Multicenter Study in Constipated Individuals and Healthy Control</i><br><a href="https://doi.org/10.1038/ajg.2009.612">10.1038/ajg.2009.612</a>                                     | 148 | 11.38         | 4.388  |
| RAO,<br>S.S.C.,<br>RATTAN<br>A-KOVIT,<br>K. &<br>PATCHAR<br>A-<br>TRAKUL,<br>T. | 2016 | NAT<br>GASTROENTEROL<br>HEPATOL  | <i>Diagnosis and management of chronic constipation in adults</i><br><a href="https://doi.org/10.1038/nrgastro.2016.53">https://doi.org/10.1038/nrgastro.2016.53</a>                                                                                                            | 116 | 16.57         | 10.157 |
| CAMILLE<br>RI, M. et al.                                                        | 2010 | NEUROGASTROENTE<br>ROL MOTIL     | <i>Wireless pH-motility capsule for colonic transit: prospective comparison with radiopaque markers in chronic constipation</i><br><a href="https://doi.org/10.1111/j.1365-2982.2010.01517.x">https://doi.org/10.1111/j.1365-2982.2010.01517.x</a>                              | 106 | 8.15          | 3.143  |

*Layout settings VosViewer: Attraction = 1; Repulsion = - 3; Resolution = 1; min. Cluster size = 1; an online visualization of the clustered terms is available at <https://tinyurl.com/y83ulbdo>*

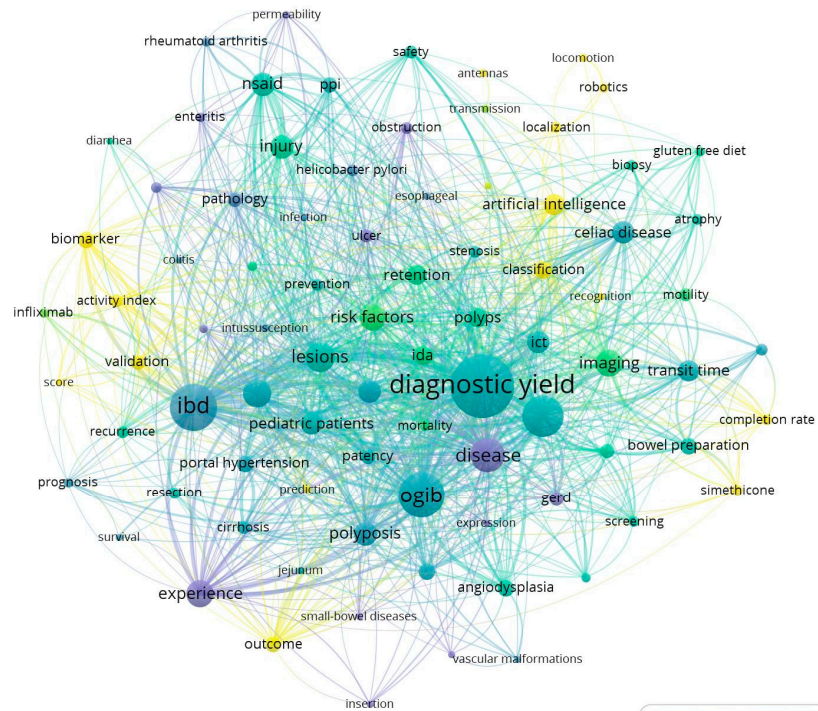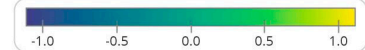

Supplement: s1 [file s1]
